# Supplementary material
Source: MDPI journal article supplement (https://www.mdpi.com/1424-8247/9/3/43)
Supplement: s1 [file s1]

# Supplementary Materials: Convergent Synthesis of Two Fluorescent Ebselen-Coumarin Heterodimers

Jim Küppers, Anna-Christina Schulz-Fincke, Jerzy Palus, Mirosław Giurg, Jacek Skarzewski and Michael Gütschow

## Compound 3

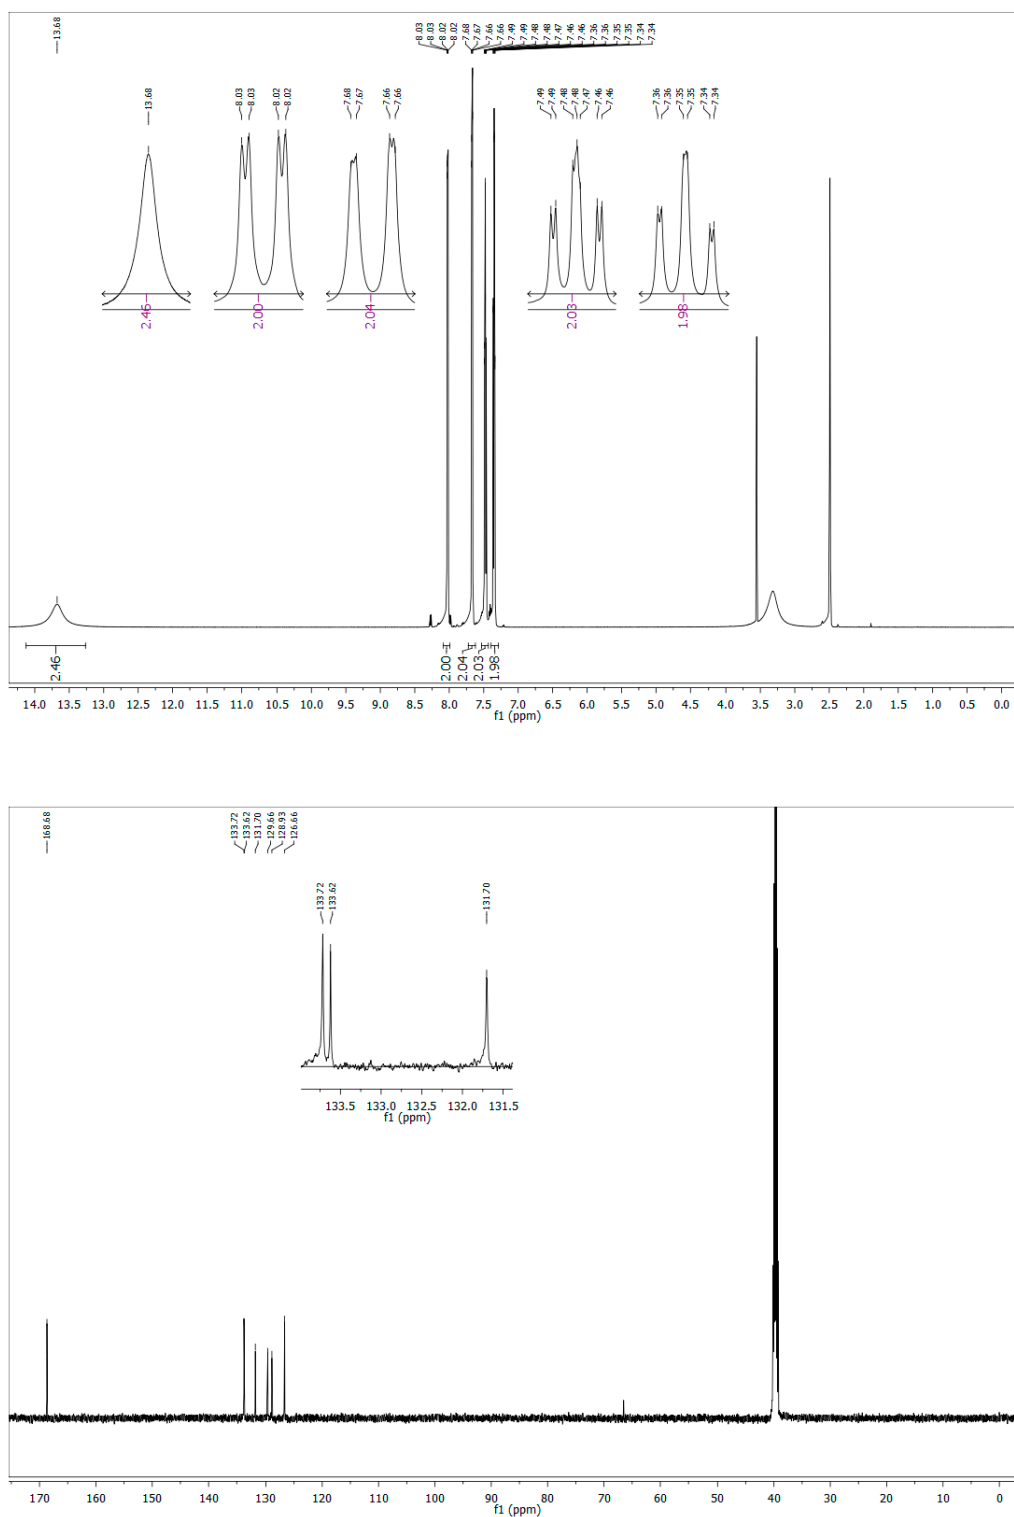

Figure S1.  $^1\text{H}$ - and  $^{13}\text{C}$ -NMR spectrum of compound 3.

[illegible]

**Figure S2.**  $^1\text{H}$ - and  $^{13}\text{C}$ -NMR spectrum of compound **5**.

## Compound 6

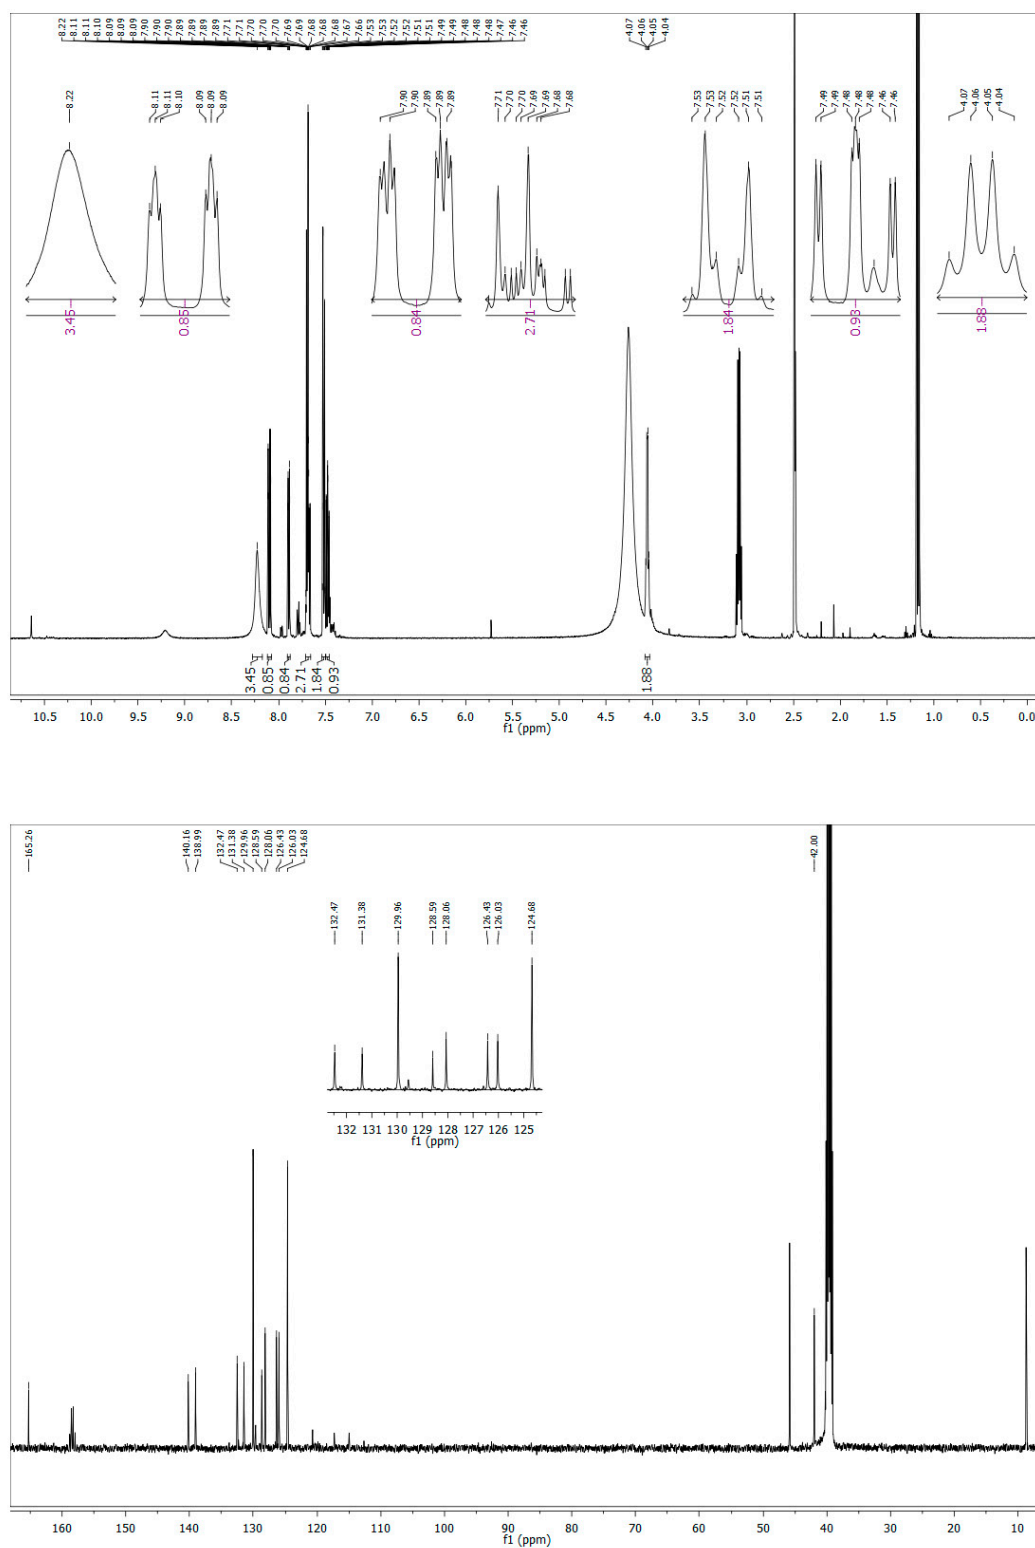Figure S3. <sup>1</sup>H- and <sup>13</sup>C-NMR spectrum of compound 6.

## Compound 8

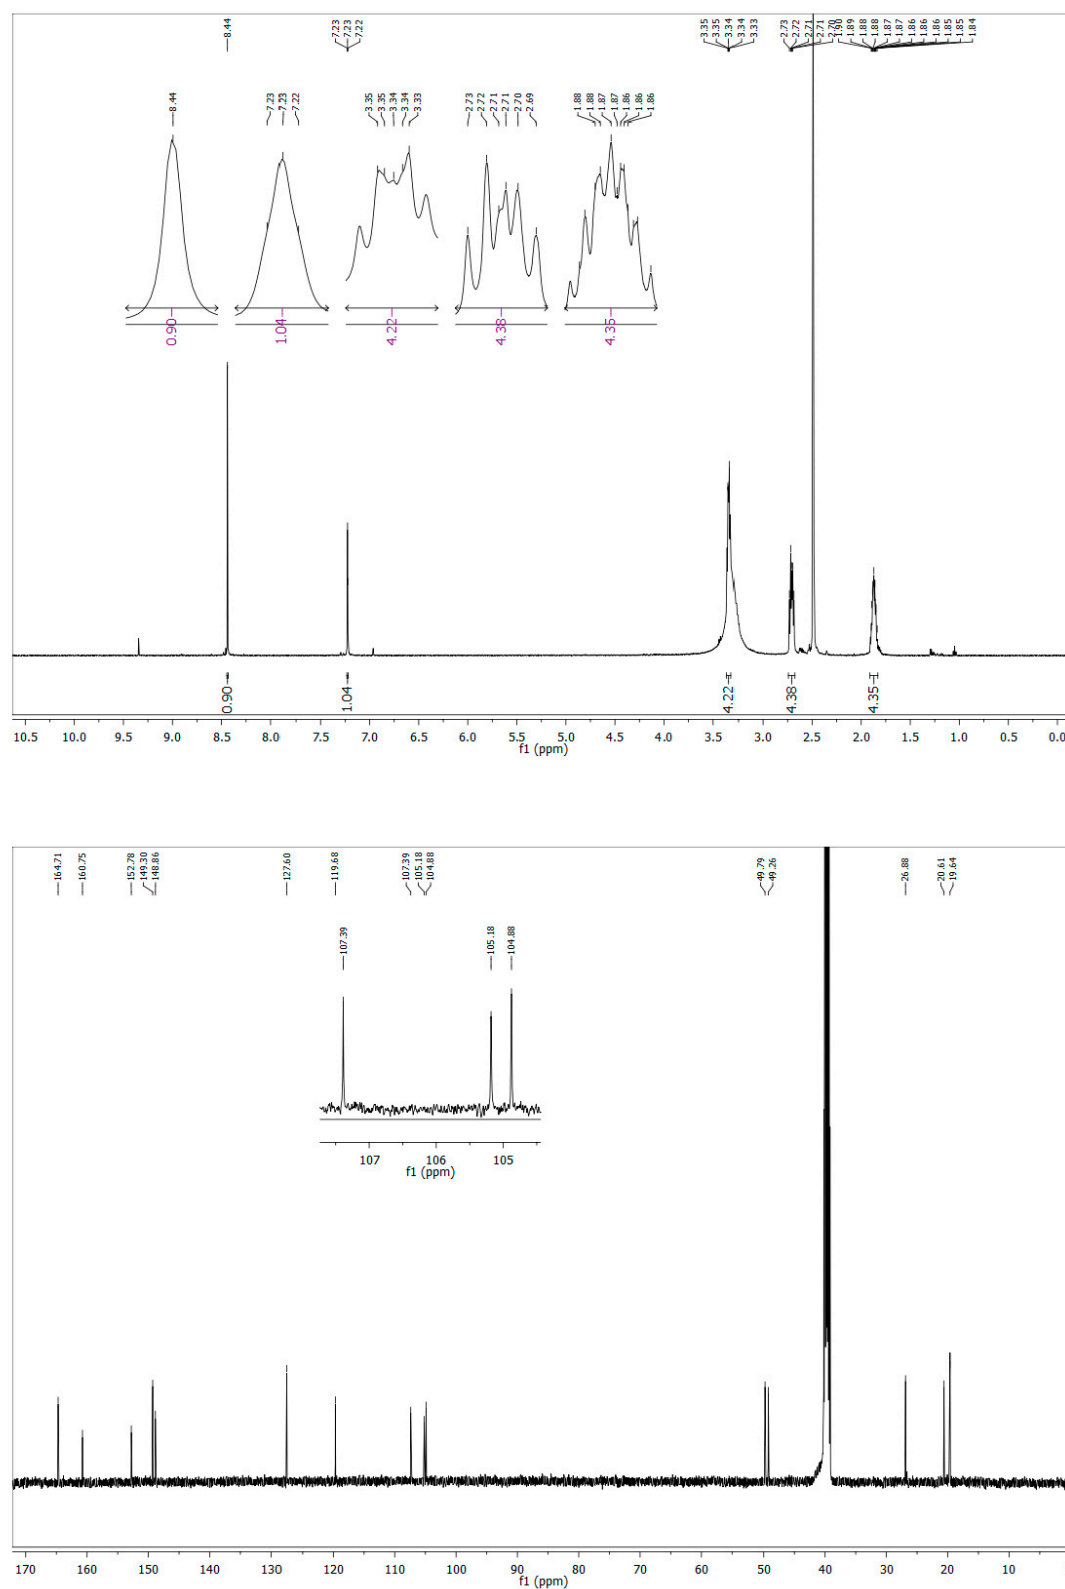Figure S4.  $^1\text{H}$ - and  $^{13}\text{C}$ -NMR spectrum of compound 8.

[illegible]

**Figure S5.**  $^1\text{H}$ - and  $^{13}\text{C}$ -NMR spectrum of compound **9**.

## Compound 14

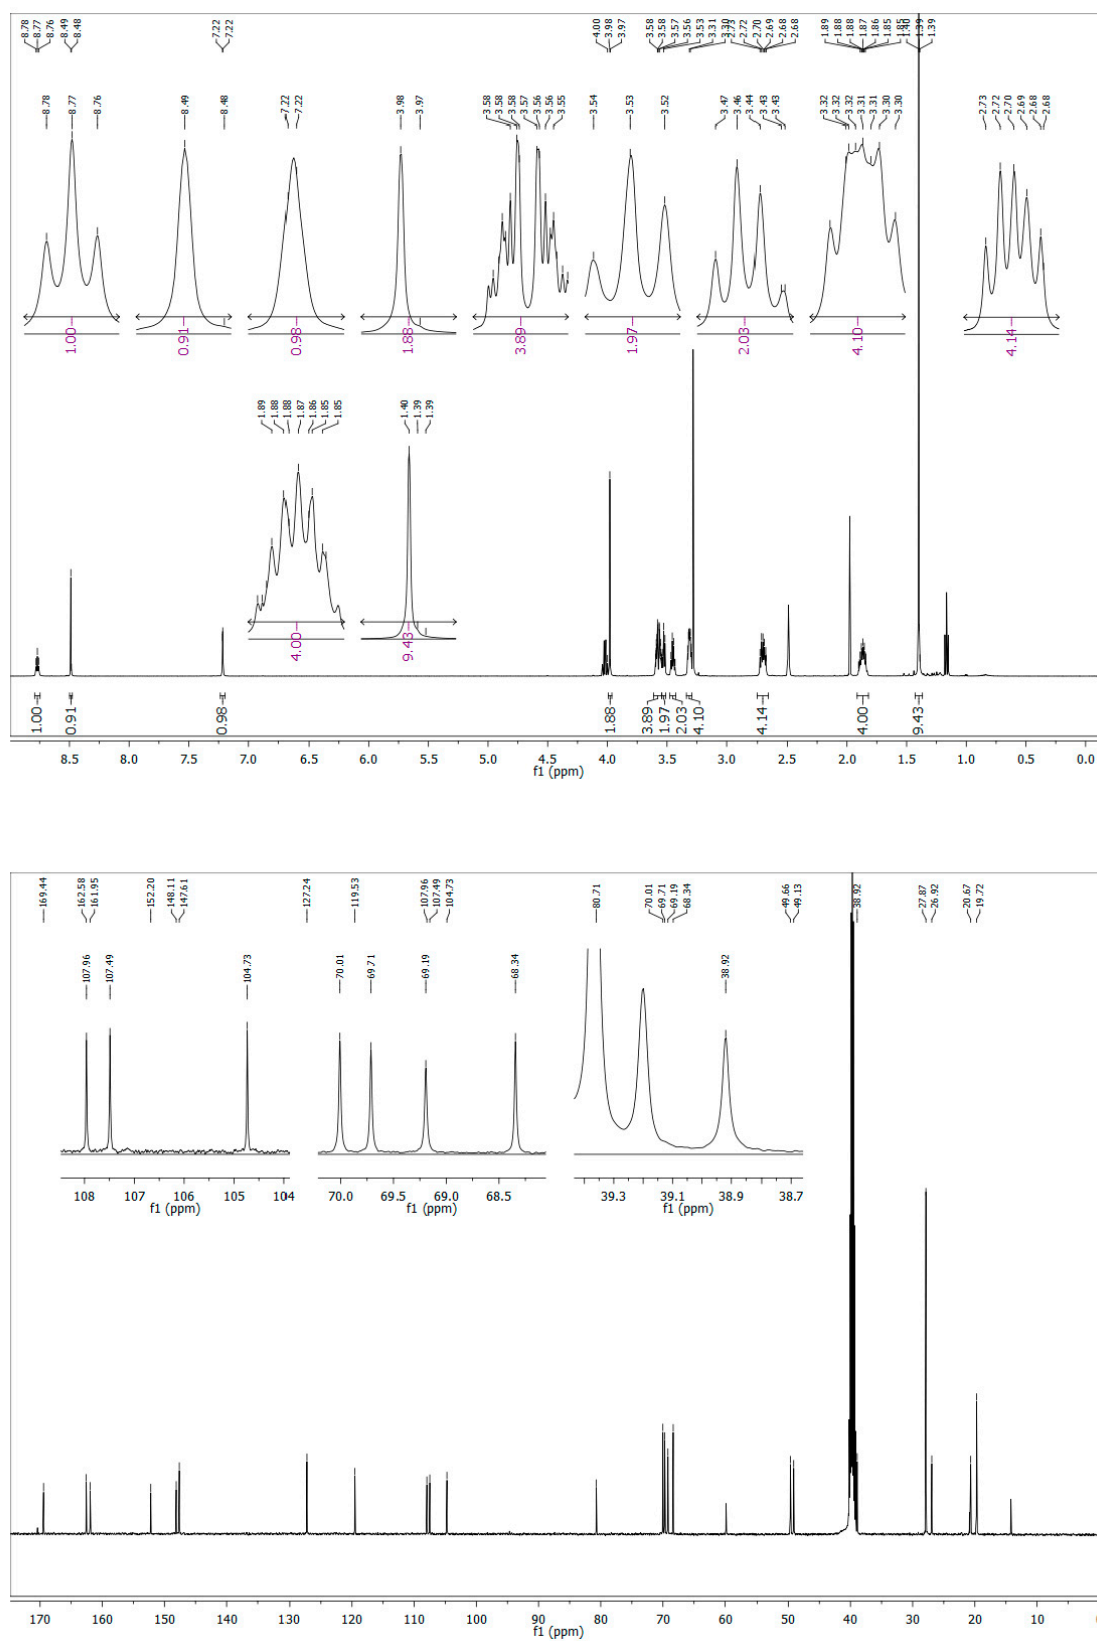Figure S6. <sup>1</sup>H- and <sup>13</sup>C-NMR of spectrum of compound 14.

## Compound 15

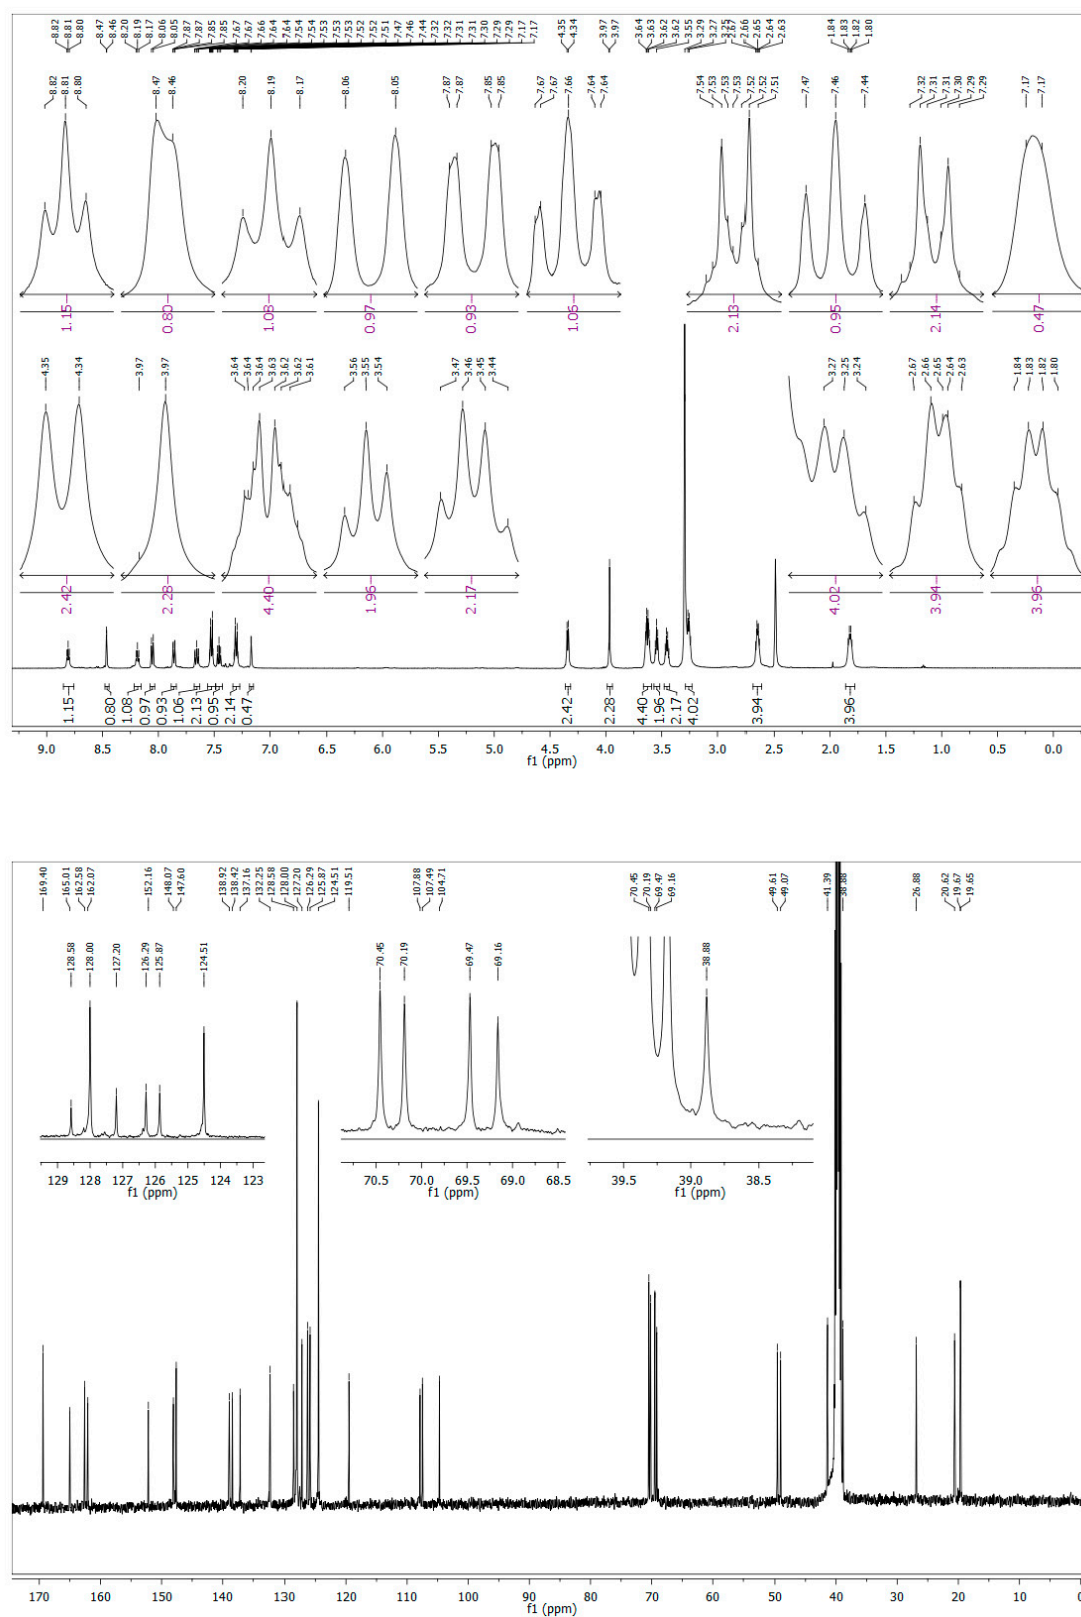Figure S7.  $^1\text{H}$ - and  $^{13}\text{C}$ -NMR spectrum of compound 15.
